# Supplementary material for: Concomitant Sepsis Diagnoses in Acute Myocardial Infarction-Cardiogenic Shock: 15-Year National Temporal Trends, Management, and Outcomes
Source: PubMed Central journal article supplement — Crit Care Explor. 2022 Feb 4;4(2):e0637. doi: 10.1097/CCE.0000000000000637 (PMC8820909; doi:10.1097/cce.0000000000000637), 2022-02-04
Supplement: cc9-4-e0637-s001.pdf [file cc9-4-e0637-s001.pdf]

## **SUPPLEMENTARY MATERIAL**

### **Concomitant Sepsis Diagnoses in Acute Myocardial Infarction-Cardiogenic Shock: 15-Year National Temporal Trends, Management, and Outcomes**

Jacob C Jentzer, MD; Anusha G Bhat, MD; Sri Harsha Patlolla, MBBS; Shashank S Sinha, MD  
MSc; P Elliott Miller, MD; Patrick R Lawler, MD MPH; Sean van Diepen, MD MSc; Ashish K  
Khanna, MD; David X Zhao, MD PhD; Saraschandra Vallabhajosyula, MD MSc

**Supplementary Table 1. Administrative codes used for identification of diagnoses and procedures**

| <b>Comorbidity</b>                 | <b>International Classification of Diseases 9.0 Clinical Modification codes</b>                                                                                                                                                                                                        |
|------------------------------------|----------------------------------------------------------------------------------------------------------------------------------------------------------------------------------------------------------------------------------------------------------------------------------------|
| Sepsis diagnosis                   | 038.0, 038.10, 038.11, 038.19, 038.2, 038.3, 038.4, 038.40, 038.41, 038.42, 038.43, 038.44, 038.49, 038.8, 038.9, 790.7, 117.9, 112.5, 115.04, 115.14, 115.94, 112.81, 112.83, 003.1, 003.21, 036.2, 036.3, 036.0, 036.1, 036.42, 020.2, 022.3, 098.89, 098.84, 098.82, 995.92, 785.52 |
| Cardiac arrest                     | 427.5, 427.41, 99.60, 99.63                                                                                                                                                                                                                                                            |
| Coronary angiography               | 37.22, 37.23, 88.53-88.56                                                                                                                                                                                                                                                              |
| Percutaneous coronary intervention | 00.66, 36.01, 36.02, 36.05, 36.06, 36.07, 88.57                                                                                                                                                                                                                                        |
| Invasive hemodynamic assessment    | 89.63, 89.64, 89.66, 89.67, 89.68                                                                                                                                                                                                                                                      |
| Mechanical circulatory support     | 37.61, 37.68, 39.65                                                                                                                                                                                                                                                                    |
| Invasive mechanical ventilation    | 96.7, 96.70, 96.71, 96.72                                                                                                                                                                                                                                                              |
| Hemodialysis                       | 39.95                                                                                                                                                                                                                                                                                  |
| Hepatic failure                    | 570.0, 572.2, 573.3, 573.4                                                                                                                                                                                                                                                             |
| Respiratory failure                | 518.81, 518.82, 518.85, 786.09, 799.1, 96.7, 96.70, 96.71, 96.72                                                                                                                                                                                                                       |
| Renal failure                      | 584, 584.5, 584.6, 584.7, 584.8, 584.9                                                                                                                                                                                                                                                 |
| Hematologic failure                | 286.6-286.9, 287.4, 287.5                                                                                                                                                                                                                                                              |
| Neurological failure               | 293, 293.0, 293.1, 293.8, 293.81-293.84, 293.89, 293.9, 348.1, 348.3, 348.30, 348.81, 348.39, 780.01, 780.09, 89.14                                                                                                                                                                    |

**Supplementary Table 2. Multivariable regression for in-hospital mortality in AMI-CS**

| Total cohort<br>(N=444,253)                      |                                     | Odds<br>ratio      | 95% confidence interval |             | P      |
|--------------------------------------------------|-------------------------------------|--------------------|-------------------------|-------------|--------|
|                                                  |                                     |                    | Lower Limit             | Upper Limit |        |
| No Sepsis Diagnoses                              |                                     | Reference category |                         |             |        |
| Sepsis Diagnoses                                 |                                     | 1.21               | 1.18                    | 1.25        | <0.001 |
| Age (years)                                      | <75 years                           | Reference category |                         |             |        |
|                                                  | >75 years                           | 1.95               | 1.92                    | 1.98        | <0.001 |
| Female sex                                       |                                     | 1.1                | 1.08                    | 1.12        | <0.001 |
| Race                                             | White                               | Reference category |                         |             |        |
|                                                  | Black                               | 0.93               | 0.89                    | 0.95        | <0.001 |
|                                                  | Others <sup>a</sup>                 | 1.06               | 1.04                    | 1.07        | <0.001 |
| Primary payer                                    | Medicare                            | Reference category |                         |             |        |
|                                                  | Medicaid                            | 0.71               | 0.69                    | 0.73        | <0.001 |
|                                                  | Private                             | 0.62               | 0.61                    | 0.64        | <0.001 |
|                                                  | Others <sup>b</sup>                 | 0.91               | 0.88                    | 0.93        | <0.001 |
| Year                                             | 2000-2005                           | Reference Category |                         |             |        |
|                                                  | 2006-2011                           | 0.65               | 0.64                    | 0.66        | <0.001 |
|                                                  | 2012-2014                           | 0.58               | 0.57                    | 0.6         | <0.001 |
| Quartile of median household income for zip code | 0-25 <sup>th</sup>                  | Reference category |                         |             |        |
|                                                  | 26 <sup>th</sup> -50 <sup>th</sup>  | 0.99               | 0.97                    | 1.01        | 0.36   |
|                                                  | 51 <sup>st</sup> -75 <sup>th</sup>  | 0.96               | 0.94                    | 0.98        | <0.001 |
|                                                  | 75 <sup>th</sup> -100 <sup>th</sup> | 0.94               | 0.922                   | 0.96        | <0.001 |
| Hospital teaching status and location            | Rural                               | Reference category |                         |             |        |
|                                                  | Urban Non-Teaching                  | 1.04               | 1.01                    | 1.07        | 0.006  |
|                                                  | Urban Teaching                      | 1.15               | 1.12                    | 1.19        | <0.001 |

|                                            |                                 |                    |      |      |        |
|--------------------------------------------|---------------------------------|--------------------|------|------|--------|
| <b>Hospital bed-size</b>                   | <b>Small</b>                    | Reference category |      |      |        |
|                                            | <b>Medium</b>                   | 1.04               | 1.01 | 1.07 | 0.006  |
|                                            | <b>Large</b>                    | 1.08               | 1.05 | 1.11 | <0.001 |
| <b>Hospital region</b>                     | <b>Northeast</b>                | Reference category |      |      |        |
|                                            | <b>Midwest</b>                  | 0.96               | 0.94 | 0.98 | 0.001  |
|                                            | <b>South</b>                    | 1.05               | 1.03 | 1.07 | <0.001 |
|                                            | <b>West</b>                     | 0.94               | 0.92 | 0.96 | <0.001 |
| <b>Charlson Comorbidity Index</b>          | <b>0-3</b>                      | Reference category |      |      |        |
|                                            | <b>4-6</b>                      | 1.30               | 1.27 | 1.32 | <0.001 |
|                                            | <b>≥ 7</b>                      | 1.33               | 1.30 | 1.37 | 0.003  |
| <b>Type of AMI</b>                         | <b>ST-segment elevation</b>     | Reference category |      |      |        |
|                                            | <b>Non-ST-segment elevation</b> | 0.68               | 0.67 | 0.69 | <0.001 |
| <b>Multi-organ failure</b>                 |                                 | 1.46               | 1.44 | 1.49 | <0.001 |
| <b>Cardiac arrest</b>                      |                                 | 3.15               | 3.10 | 3.20 | <0.001 |
| <b>Atrial fibrillation</b>                 |                                 | 0.86               | 0.85 | 0.87 | <0.001 |
| <b>Atrial flutter</b>                      |                                 | 0.62               | 0.60 | 0.65 | <0.001 |
| <b>Coronary angiography</b>                |                                 | 0.54               | 0.53 | 0.55 | <0.001 |
| <b>Percutaneous coronary intervention</b>  |                                 | 0.48               | 0.47 | 0.49 | <0.001 |
| <b>Coronary artery bypass grafting</b>     |                                 | 0.35               | 0.34 | 0.36 | <0.001 |
| <b>Pulmonary artery catheterization</b>    |                                 | 0.98               | 0.96 | 1.01 | 0.27   |
| <b>Mechanical circulatory support</b>      |                                 | 1.27               | 1.25 | 1.29 | <0.001 |
| <b>Non-invasive mechanical ventilation</b> |                                 | 0.67               | 0.64 | 0.70 | <0.001 |
| <b>Invasive mechanical ventilation</b>     |                                 | 1.59               | 1.57 | 1.62 | <0.001 |
| <b>Acute hemodialysis</b>                  |                                 | 1.64               | 1.58 | 1.70 | <0.001 |

**Legend:** <sup>a</sup>Hispanic, Asian or Pacific Islander, Native American, Others; <sup>b</sup>Self-Pay, No Charge, Others

**Abbreviations:** AMI: acute myocardial infarction; CS: cardiogenic shock

**Supplementary Table 3: Baseline characters contrasting sepsis and septic shock diagnoses  
in AMI-CS**

| Characteristic                                              |                                         | Sepsis Diagnosis<br>(N=13,993) | Septic shock diagnosis<br>(N=13,066) | <i>P</i> |
|-------------------------------------------------------------|-----------------------------------------|--------------------------------|--------------------------------------|----------|
| <b>Age (years)</b>                                          |                                         | 68 ± 13                        | 69 ± 12.5                            | <0.001   |
| <b>Female</b>                                               |                                         | 36.1                           | 35.8                                 | 0.70     |
| <b>Race</b>                                                 | <b>White</b>                            | 61.1                           | 58.9                                 | <0.001   |
|                                                             | <b>Black</b>                            | 7.5                            | 8.8                                  |          |
|                                                             | <b>Others<sup>a</sup></b>               | 31.4                           | 32.3                                 |          |
| <b>Primary payer</b>                                        | <b>Medicare</b>                         | 59.0                           | 63.2                                 | <0.001   |
|                                                             | <b>Medicaid</b>                         | 9.4                            | 8.9                                  |          |
|                                                             | <b>Private</b>                          | 23.9                           | 19.7                                 |          |
|                                                             | <b>Others<sup>b</sup></b>               | 7.8                            | 8.2                                  |          |
| <b>Quartile of median household<br/>income for zip code</b> | <b>0-25<sup>th</sup></b>                | 25.7                           | 28.4                                 | <0.001   |
|                                                             | <b>26<sup>th</sup>-50<sup>th</sup></b>  | 26.3                           | 24.2                                 |          |
|                                                             | <b>51<sup>st</sup>-75<sup>th</sup></b>  | 23.6                           | 23.1                                 |          |
|                                                             | <b>75<sup>th</sup>-100<sup>th</sup></b> | 24.3                           | 24.2                                 |          |
| <b>Charlson Comorbidity Index</b>                           | <b>0-3</b>                              | 21.5                           | 18.2                                 | <0.001   |
|                                                             | <b>4-6</b>                              | 56.2                           | 54.9                                 |          |
|                                                             | <b>≥ 7</b>                              | 22.3                           | 26.9                                 |          |
| <b>Type of MI</b>                                           | <b>STEMI</b>                            | 60.3                           | 50.7                                 | <0.001   |
|                                                             | <b>NSTEMI</b>                           | 39.7                           | 49.3                                 | <0.001   |

|                                              |                           |      |      |        |
|----------------------------------------------|---------------------------|------|------|--------|
| <b>Cardiac arrest</b>                        |                           | 30.2 | 29.8 | 0.43   |
| <b>Hypertension</b>                          |                           | 43.9 | 46.4 | <0.001 |
| <b>Hyperlipidemia</b>                        |                           | 21.7 | 24.5 | <0.001 |
| <b>Multiorgan failure</b>                    |                           | 90.6 | 92.7 | <0.001 |
| <b>Heart failure</b>                         |                           | 17.4 | 22.5 | <0.001 |
| <b>Hospital teaching status and location</b> | <b>Rural</b>              | 3.8  | 4.4  | <0.001 |
|                                              | <b>Urban non-teaching</b> | 34.2 | 31.9 |        |
|                                              | <b>Urban teaching</b>     | 62.0 | 63.7 |        |
| <b>Hospital bed-size</b>                     | <b>Small</b>              | 6.3  | 7.0  | 0.05   |
|                                              | <b>Medium</b>             | 20.8 | 20.9 |        |
|                                              | <b>Large</b>              | 73.0 | 72.1 |        |
| <b>Hospital region</b>                       | <b>Northeast</b>          | 21.2 | 21.2 | <0.001 |
|                                              | <b>Midwest</b>            | 20.6 | 19.2 |        |
|                                              | <b>South</b>              | 37.6 | 35.7 |        |
|                                              | <b>West</b>               | 20.6 | 23.9 |        |
| <b>Coronary angiography</b>                  |                           | 68.7 | 60.4 | <0.001 |
| <b>Percutaneous coronary intervention</b>    |                           | 46.1 | 40.2 | <0.001 |
| <b>Coronary artery bypass graft</b>          |                           | 23.3 | 15.1 | <0.001 |
| <b>Mechanical support device</b>             |                           | 54.3 | 41.4 | <0.001 |
| <b>Invasive mechanical ventilation</b>       |                           | 61.9 | 68.6 | <0.001 |
| <b>Non-invasive mechanical ventilation</b>   |                           | 4.9  | 5.9  | <0.001 |
| <b>Hemodialysis</b>                          |                           | 10.2 | 13.2 | <0.001 |

|                                                                        |                    |                    |        |
|------------------------------------------------------------------------|--------------------|--------------------|--------|
| <b>In-hospital mortality</b>                                           | 38.6               | 50.5               | <0.001 |
| <b>Length of stay (days)<sup>a</sup></b>                               | 15.0 (8.0-25.0)    | 12.0 (6.0-22.0)    | <0.001 |
| <b>Hospitalization costs (x1000 United States Dollars)<sup>a</sup></b> | \$181 (\$94-\$324) | \$263 (\$77-\$342) | <0.001 |

**Legend:** Represented as percentage or <sup>a</sup>median (interquartile range)

**Abbreviations:** AMI: acute myocardial infarction; CS: cardiogenic shock



**Supplementary Table 4: Sensitivity analysis between sepsis and septic shock diagnosis in AMI-CS**

| Sub-Group             | Sepsis Diagnosis |                         |             |          | Septic Shock Diagnosis |                         |             |          |
|-----------------------|------------------|-------------------------|-------------|----------|------------------------|-------------------------|-------------|----------|
|                       | Odds ratio       | 95% Confidence Interval |             | <i>P</i> | Odds ratio             | 95% Confidence Interval |             | <i>P</i> |
|                       |                  | Upper Limit             | Lower Limit |          |                        | Upper Limit             | Lower Limit |          |
|                       |                  |                         |             |          |                        |                         |             |          |
| Age <75 years         | 1.15             | 1.11                    | 1.20        | <0.001   | 1.54                   | 1.47                    | 1.62        | <0.001   |
| Age >75 years         | 0.99             | 0.95                    | 1.04        | <0.001   | 1.14                   | 1.07                    | 1.22        | <0.001   |
| Male                  | 1.09             | 1.05                    | 1.13        | <0.001   | 1.42                   | 1.35                    | 1.49        | <0.001   |
| Female                | 1.13             | 1.08                    | 1.18        | <0.001   | 1.38                   | 1.30                    | 1.48        | <0.001   |
| White                 | 1.11             | 1.07                    | 1.15        | <0.001   | 1.39                   | 1.32                    | 1.47        | <0.001   |
| Non-white             | 1.13             | 1.02                    | 1.25        | 0.01     | 1.44                   | 1.25                    | 1.64        | <0.001   |
| Other races           | 1.09             | 1.04                    | 1.15        | <0.001   | 1.42                   | 1.32                    | 1.52        | <0.001   |
| No multiorgan failure | 0.92             | 0.83                    | 1.02        | 0.13     | 0.95                   | 0.82                    | 1.10        | 0.52     |
| Multiorgan failure    | 1.12             | 1.09                    | 1.15        | <0.001   | 1.44                   | 1.38                    | 1.50        | <0.001   |
| No cardiac arrest     | 1.25             | 1.20                    | 1.29        | <0.001   | 1.54                   | 1.47                    | 1.61        | <0.001   |
| Cardiac arrest        | 0.83             | 0.79                    | 0.87        | <0.001   | 1.11                   | 1.03                    | 1.19        | 0.004    |

**Abbreviations:** AMI: acute myocardial infarction; CS: cardiogenic shock
